# Supplementary material for: A fixed-point titration method for the determination of ammonium in anaerobic systems
Source: Royal Society of Chemistry journal article supplement (doi:10.1039/c8ay00882e), 2018-01-01
Supplement: c8ay00882e1.pdf [file c8ay00882e1.pdf]

1 ***Supplementary Material***

2

3 **Fixed-point titration method for the determination of ammonium in anaerobic**

4 **systems**

5

6 Zhe-Xuan Mu<sup>1</sup>, Chuan-Shu He<sup>1</sup>, Jian-Kai Jiang<sup>1\*</sup>, Yang Mu<sup>1,2</sup>

7

8 <sup>1</sup>CAS Key Laboratory of Urban Pollutant Conversion, Collaborative Innovation

9 Centre of Suzhou Nano Science and Technology, Department of Chemistry,

10 University of Science & Technology of China, Hefei, 230026, China

11 <sup>2</sup>Anhui Province Key Laboratory of Polar Environment and Global Change,

12 University of Science & Technology of China, Hefei, 230026, China

13

14

15

16 **\*Corresponding author:**

17 Dr. Jian-Kai Jiang E-mail: [jkjiang@ustc.edu.cn](mailto:jkjiang@ustc.edu.cn)

19 In the solution, the charge balance at pH<sub>1</sub> 8.75 can be obtained as follows:

$$\begin{aligned}
 20 \quad & [\text{NH}_4^+]_1 + [\text{H}^+]_1 + n[\text{M}^{n+}]_1 = [\text{VFA}^-]_1 + [\text{OH}^-]_1 + [\text{X}^-]_1 + [\text{H}_2\text{PO}_4^-]_1 + 2[\text{HPO}_4^{2-}]_1 \\
 21 \quad & \quad \quad \quad + 3[\text{PO}_4^{3-}]_1 + [\text{HCO}_3^-]_1 + 2[\text{CO}_3^{2-}]_1 + [\text{HS}^-]_1 + 2[\text{S}^{2-}]_1 \quad (1)
 \end{aligned}$$

22 where [ ] indicates the molarity, M<sup>n+</sup> is the metal ion, and X<sup>-</sup> is the halide ion.

23 At this endpoint, the volume of sample solution increased from initial V<sub>0</sub> to V<sub>1</sub>,

24 Eq. (1) multiplied by V<sub>1</sub> became:

$$\begin{aligned}
 25 \quad & [\text{NH}_4^+]_1 V_1 + [\text{H}^+]_1 V_1 + n[\text{M}^{n+}]_1 V_1 = [\text{VFA}^-]_1 V_1 + [\text{OH}^-]_1 V_1 + [\text{X}^-]_1 V_1 + [\text{H}_2\text{PO}_4^-]_1 V_1 \\
 26 \quad & \quad \quad \quad + 2[\text{HPO}_4^{2-}]_1 V_1 + 3[\text{PO}_4^{3-}]_1 V_1 + [\text{HCO}_3^-]_1 V_1 \\
 27 \quad & \quad \quad \quad + 2[\text{CO}_3^{2-}]_1 V_1 + [\text{HS}^-]_1 V_1 + 2[\text{S}^{2-}]_1 V_1 \quad (2)
 \end{aligned}$$

28 The sodium hydroxide solution at a concentration of C<sub>b</sub> continued to titrate until

29 pH<sub>2</sub> 9.75. The volume of sample solution became V<sub>2</sub> with added volume V<sub>X</sub>. The

30 equation of charge balance can be reformulated:

$$\begin{aligned}
 31 \quad & [\text{NH}_4^+]_2 + [\text{H}^+]_2 + n[\text{M}^{n+}]_2 + [\text{Na}^+]_2 = [\text{VFA}^-]_2 + [\text{OH}^-]_2 + [\text{X}^-]_2 + [\text{H}_2\text{PO}_4^-]_2 \\
 32 \quad & \quad \quad \quad + 2[\text{HPO}_4^{2-}]_2 + 3[\text{PO}_4^{3-}]_2 + [\text{HCO}_3^-]_2 + 2[\text{CO}_3^{2-}]_2 \\
 33 \quad & \quad \quad \quad + [\text{HS}^-]_2 + 2[\text{S}^{2-}]_2 \quad (3)
 \end{aligned}$$

34 Similarly, Eq. (3) multiplies by V<sub>2</sub> became:

$$\begin{aligned}
 35 \quad & [\text{NH}_4^+]_2 V_2 + [\text{H}^+]_2 V_2 + n[\text{M}^{n+}]_2 V_2 + [\text{Na}^+]_2 V_2 = [\text{VFA}^-]_2 V_2 + [\text{OH}^-]_2 V_2 + [\text{X}^-]_2 V_2 \\
 36 \quad & \quad \quad \quad + [\text{H}_2\text{PO}_4^-]_2 V_2 + 2[\text{HPO}_4^{2-}]_2 V_2 + 3[\text{PO}_4^{3-}]_2 V_2 \\
 37 \quad & \quad \quad \quad + [\text{HCO}_3^-]_2 V_2 + 2[\text{CO}_3^{2-}]_2 V_2 + [\text{HS}^-]_2 V_2 \\
 38 \quad & \quad \quad \quad + 2[\text{S}^{2-}]_2 V_2 \quad (4)
 \end{aligned}$$

39 Eq. (4) subtracts Eq. (2) to obtain:

$$\begin{aligned}
 40 \quad & [\text{NH}_4^+]_2 V_2 + [\text{H}^+]_2 V_2 + n[\text{M}^{n+}]_2 V_2 + n[\text{B}^{n+}]_2 V_2 - \{[\text{NH}_4^+]_1 V_1 + [\text{H}^+]_1 V_1 + n[\text{M}^{n+}]_1 V_1\} = \\
 41 \quad & [\text{VFA}^-]_2 V_2 + [\text{OH}^-]_2 V_2 + [\text{X}^-]_2 V_2 + [\text{H}_2\text{PO}_4^-]_2 V_2 + 2[\text{HPO}_4^{2-}]_2 V_2 + 3[\text{PO}_4^{3-}]_2 V_2 + [\text{HCO}_3^-]_2 V_2 \\
 42 \quad & + 2[\text{CO}_3^{2-}]_2 V_2 + [\text{HS}^-]_2 V_2 + 2[\text{S}^{2-}]_2 V_2 - \{[\text{VFA}^-]_1 V_1 + [\text{OH}^-]_1 V_1 + [\text{X}^-]_1 V_1 + [\text{H}_2\text{PO}_4^-]_1 V_1 \\
 43 \quad & + 2[\text{HPO}_4^{2-}]_1 V_1 + 3[\text{PO}_4^{3-}]_1 V_1 + [\text{HCO}_3^-]_1 V_1 + 2[\text{CO}_3^{2-}]_1 V_1 + [\text{HS}^-]_1 V_1 + 2[\text{S}^{2-}]_1 V_1\} \quad (5)
 \end{aligned}$$

44 In the range of pH<sub>1</sub> 8.75 to pH<sub>2</sub> 9.75, a certain amount of ammonium would  
 45 become NH<sub>3</sub> molecule. Nevertheless, the solubility of ammonia in the water is as high  
 46 as 1:700 (v/v), the total ammonia nitrogen can be considered as constant. Thus, the  
 47 ammonium concentration is expressed according to the ionization equilibrium:

$$48 \quad [NH_4^+]V = T_{AN} / (1 + K_{NH_4^+} / (H^+)) = T_{AN} / f_{NH_4^+} (H^+) \quad (6)$$

49 where T<sub>AN</sub> is the mole number of ammonium in the sample, and K<sub>NH<sub>4</sub><sup>+</sup></sub> is the  
 50 dissociation constant of ammonium (i.e., 9.25 at 25 °C), (H<sup>+</sup>) denotes the activity of  
 51 H<sup>+</sup>.

52 Substituting Eq. (6) into Eq. (5) and eliminating the carbonate, bicarbonate,  
 53 VFAs, sulfide and phosphate, the ammonium concentration can be expressed:

$$54 \quad C_{AN} = \frac{T_{AN}}{V_0} = \frac{(10^{-pH_2} - 10^{pH_2-14}) \times V_2 + (10^{pH_1-14} - 10^{-pH_1}) \times V_1 + (V_2 - V_1) \times C_b}{\left[ 1 / (1 + K_{NH_4^+} / 10^{-pH_1}) - 1 / (1 + K_{NH_4^+} / 10^{-pH_2}) \right] \times V_0} \quad (7)$$

55

57 **Table S1.** Concentrations of chemical reagents used in the experiments.

| Reagent                                                       | Concentration               |
|---------------------------------------------------------------|-----------------------------|
| $\text{NH}_4\text{Cl}$                                        | From 15 to 230 mmol/L       |
| $\text{KH}_2\text{PO}_4$                                      | 0, 2, 4, 6, 8, 10 mmol/L    |
| $\text{CH}_3\text{COOH}$                                      | 0, 6, 12, 18, 24, 30 mmol/L |
| $\text{NaCl}$                                                 | 0, 0.1, 0.2, 0.3, 0.4 mol/L |
| $\text{NaHCO}_3$                                              | 20 mmol/L                   |
| $\text{Na}_2\text{S} \cdot 9\text{H}_2\text{O}$               | 10 mmol/L                   |
| $\text{NaOH}$                                                 | 0.3 mol/L                   |
| $\text{HCl}$                                                  | 12 mol/L                    |
| $\text{NaKC}_4\text{H}_4\text{O}_6 \cdot 4\text{H}_2\text{O}$ | 1.77 mol/L                  |

58

59 **Table S2.** Components and their concentrations in the synthetic reactor effluents

| Component                       | Concentration               |
|---------------------------------|-----------------------------|
| NH <sub>4</sub> Cl              | 5, 25, 75, 125 mmol/L       |
| KH <sub>2</sub> PO <sub>4</sub> | 0, 2, 4, 6, 8, 10 mmol/L    |
| CH <sub>3</sub> COOH            | 0, 6, 12, 18, 24, 30 mmol/L |
| NaHCO <sub>3</sub>              | 20 mmol/L                   |
| NaCl                            | 0.2 mol/L                   |

60

62 **Table S3.** Comparison of titrated and standard ammonium concentrations.

| Standard concentration<br>(mmol/L) | Titrated concentration<br>(mmol/L) | Relative standard deviation<br>(%) |
|------------------------------------|------------------------------------|------------------------------------|
| 14.92                              | 15.33 ± 0.02                       | 1.05                               |
| 44.94                              | 46.83 ± 0.99                       | 0.85                               |
| 74.99                              | 79.88 ± 1.70                       | 0.85                               |
| 110.08                             | 109.29 ± 2.81                      | 1.04                               |
| 149.93                             | 151.76 ± 2.68                      | 0.71                               |
| 189.98                             | 191.60 ± 1.20                      | 0.25                               |
| 230.08                             | 236.25 ± 2.25                      | 0.38                               |

63

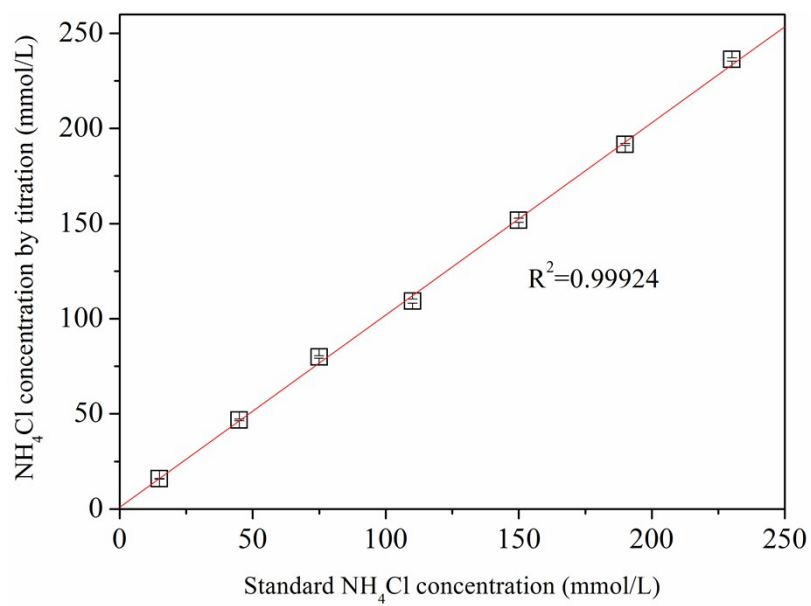

64

65

66 **Figure S1.** Comparison of ammonium concentration measured by titration and  
67 standard ammonium concentration.
